# Supplementary material
Source: MDPI journal article supplement (https://www.mdpi.com/2071-1050/13/19/11098)
Supplement: s1 [file s1]

## Supplementary

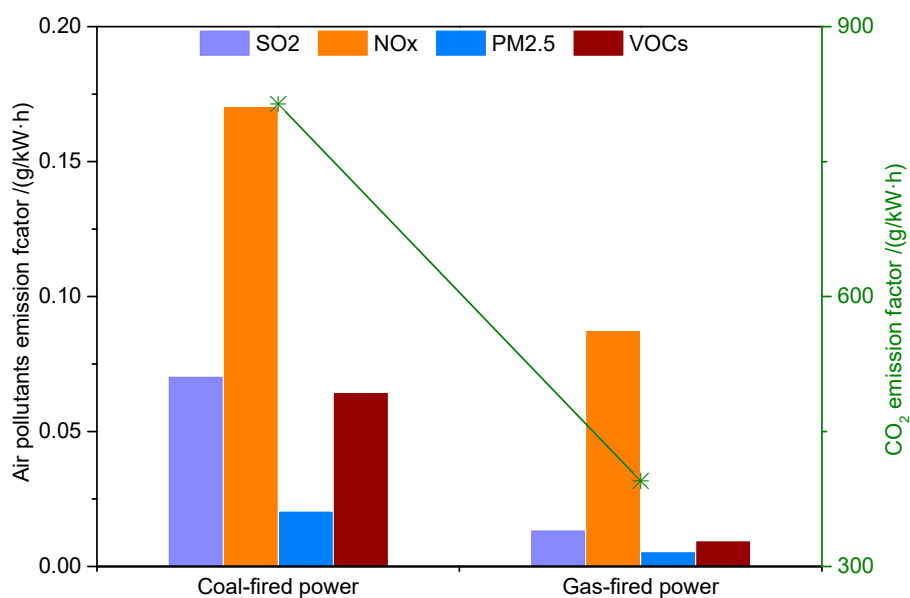

**Figure S1.** Air pollutants and CO<sub>2</sub> emission factor of power production.

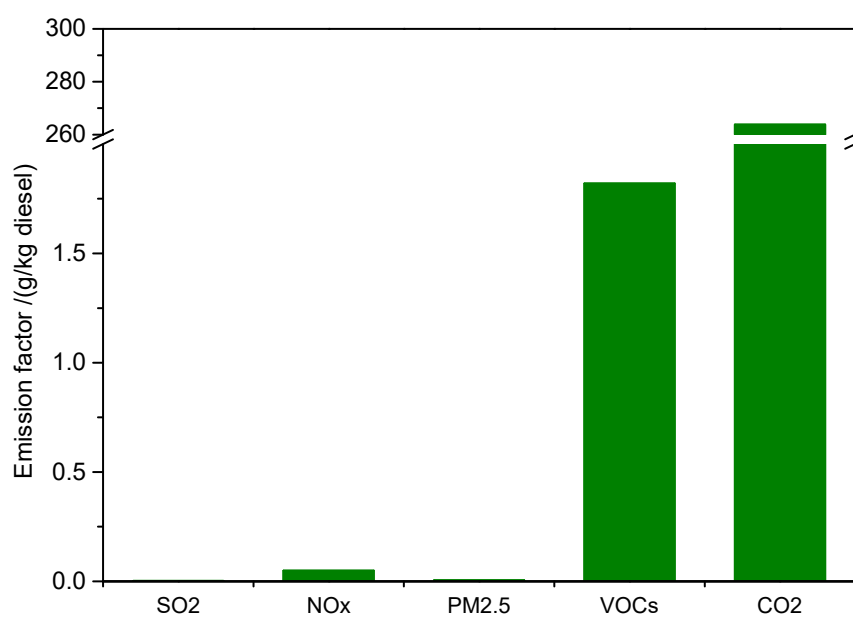

**Figure S2** Air pollutants and CO<sub>2</sub> emission factors of diesel in production, storage, transportation and marketing.

**Table S1** Average energy consumption of commercial vehicles

| Vehicles                                  | Bus   | Coach | Light-duty truck | Dump Truck | Waste Hauler |
|-------------------------------------------|-------|-------|------------------|------------|--------------|
| Ave. diesel consumption (L/100km)         | 23.84 | 22.47 | 13.08            | 34.8       | 34.43        |
| Ave. electricity consumption (kW-h/100km) | 70.18 | 70.05 | 34.3             | 164.87     | 105.6        |

**Table S2** Air pollutants emission factors of China VI commercial vehicles

| <b>Commercial vehicles</b> | <b>VOCs</b> | <b>NOx</b> | <b>PM2.5</b> |
|----------------------------|-------------|------------|--------------|
| Buses                      | 0.025       | 1.728      | 0.063        |
| Coaches                    | 0.025       | 1.728      | 0.063        |
| Light trucks               | 0.210       | 0.436      | 0.008        |
| Dump trucks                | 0.056       | 0.944      | 0.014        |
| Waste haulers              | 0.056       | 0.944      | 0.014        |
